# Supplementary material for: Surface-Modified Carboxylated Cellulose Nanofiber Hydrogels for Prolonged Release of Polyhexamethylene Biguanide Hydrochloride (PHMB) for Antimicrobial Applications
Source: MDPI journal article supplement (doi:10.3390/polym15173572), 2023-08-28
Supplement: s1 [file s1]

# Supplementary Materials: Surface-Modified Carboxylated Cellulose Nanofiber Hydrogels for Prolonged Release of Polyhexamethylene Biguanide Hydrochloride (PHMB) for Antimicrobial Applications

Pichapar O-chongpian<sup>1</sup>, Tanpong Chaiwarit<sup>1</sup>, Kittisak Jantanasakulwong<sup>2,3</sup>, Pornchai Rachtanapun<sup>2,3</sup>, Patnarin Worajittiphon<sup>4</sup>, Nutthapong Kantrong<sup>5</sup>, and Pensak Jantrawut<sup>1,3\*</sup>

<sup>1</sup> Department of Pharmaceutical Sciences, Faculty of Pharmacy, Chiang Mai University, Chiang Mai 50200, Thailand; pichaparo@gmail.com (P.O.); tanpong.c@gmail.com (T.C.); pensak.amuamu@gmail.com (P.J.)

<sup>2</sup> Division of Packaging Technology, Faculty of Agro-Industry, Chiang Mai University, Chiang Mai 50100, Thailand; kittisak.jan@cmu.ac.th (K.J.); pornchai.r@cmu.ac.th (P.R.)

<sup>3</sup> Center of Excellence in Agro Bio-Circular-Green Industry (Agro BCG), Chiang Mai University, Chiang Mai 50200, Thailand

<sup>4</sup> Department of Chemistry, Faculty of Science, Chiang Mai University, Chiang Mai 50200, Thailand; patnarin.w@cmu.ac.th

<sup>5</sup> School of Dentistry, Mae Fah Luang University, Chiang Rai 57100, Thailand nutthapong.kan@mfu.ac.th

\* Correspondence: pensak.amuamu@gmail.com, pensak.j@cmu.ac.th; Tel.: +6653944309

**Citation:** O-chongpian, P.; Chaiwarit, T.; Jantanasakulwong, K.; Rachtanapun, P.; Worajittiphon, P.; Kantrong, N.; Jantrawut, P. Supplementary Materials: Surface-Modified Carboxylated Cellulose Nanofiber Hydrogels for Prolonged Release of Polyhexamethylene Biguanide Hydrochloride (PHMB) for Antimicrobial Applications. *Polymers* **2023**, *15*, 3572. <https://doi.org/10.3390/polym15173572>

Academic Editor: Jem-Kun Chen

Received: 30 June 2023

Revised: 23 August 2023

Accepted: 25 August 2023

Published: 28 August 2023

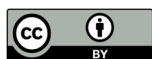

**Copyright:** © 2023 by the authors. Licensee MDPI, Basel, Switzerland. This article is an open access article distributed under the terms and conditions of the Creative Commons Attribution (CC BY) license (<http://creativecommons.org/licenses/by/4.0/>).

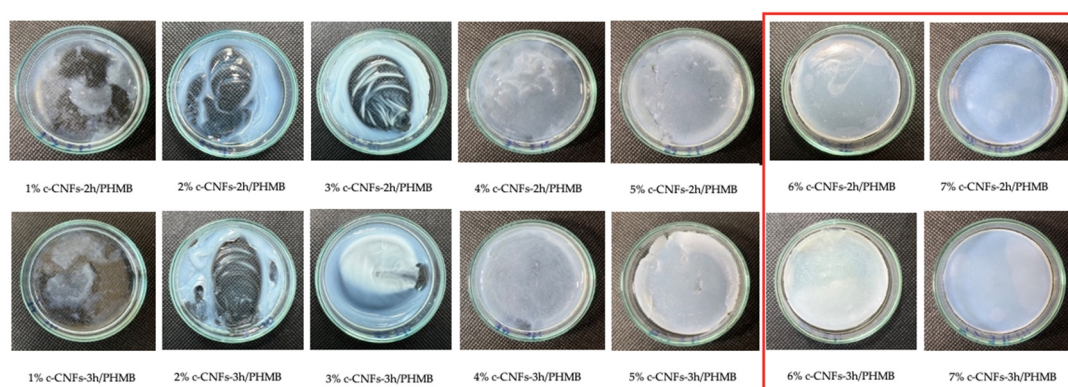

**Figure S1.** The appearance of c-CNFs hydrogels loading PHMB by the variation of reaction time (2 and 3 h.) and ratio of c-CNFs (1–7% w/v).

**Table S1.** Puncture strength, gel content (GC), maximum swelling degree (MSD) and drug content of c-CNFs hydrogels containing PHMB.

| Formulations      | Puncture strength<br>(N/mm <sup>2</sup> ) | GC (%)                    | MSD (%)                     | Drug content (%)          |
|-------------------|-------------------------------------------|---------------------------|-----------------------------|---------------------------|
| 6% c-CNFs-2h/PHMB | 0.16 ± 0.02 <sup>a</sup>                  | 55.53 ± 1.97 <sup>a</sup> | 77.52 ± 21.37 <sup>a</sup>  | 68.42 ± 3.93 <sup>a</sup> |
| 6% c-CNFs-3h/PHMB | 0.17 ± 0.03 <sup>a</sup>                  | 54.67 ± 5.57 <sup>a</sup> | 74.61 ± 14.04 <sup>a</sup>  | 66.47 ± 5.71 <sup>a</sup> |
| 7% c-CNFs-2h/PHMB | 0.31 ± 0.03 <sup>b</sup>                  | 30.60 ± 2.71 <sup>b</sup> | 231.19 ± 22.09 <sup>b</sup> | 88.69 ± 4.99 <sup>b</sup> |
| 7% c-CNFs-3h/PHMB | 0.30 ± 0.02 <sup>b</sup>                  | 29.07 ± 3.91 <sup>b</sup> | 225.44 ± 10.32 <sup>b</sup> | 86.64 ± 1.90 <sup>b</sup> |

For each test, average values with the same letter are not significantly different. Thus, average values with the different letter, e.g., 'a' or 'b' are statistically different ( $p < 0.05$ ).
